# Supplementary material for: PHQ-9, CES-D, health insurance data—who is identified with depression? A Population-based study in persons with diabetes
Source: Springer Nature journal article supplement (doi:10.1186/s13098-023-01028-7), 2023-03-22
Supplement: 13098_2023_1028_MOESM1_ESM.pdf [file 13098_2023_1028_MOESM1_ESM.pdf]

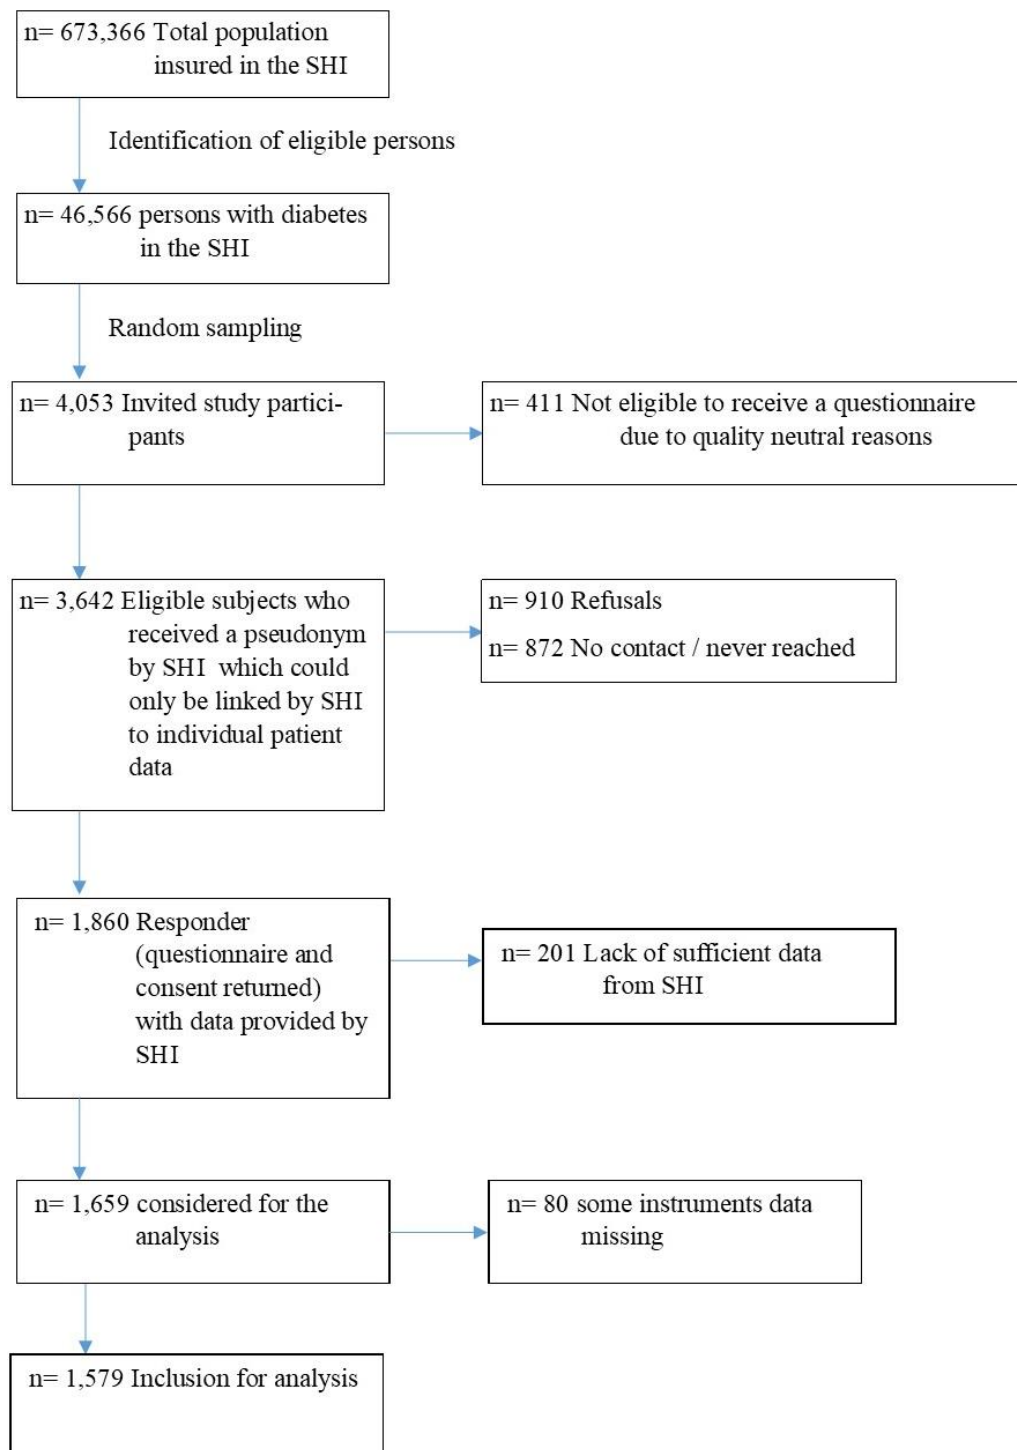

Appendix Figure 1: Flowchart of study participants
