# Supplementary material for: PHQ-9, CES-D, health insurance data—who is identified with depression? A Population-based study in persons with diabetes
Source: Springer Nature journal article supplement (doi:10.1186/s13098-023-01028-7), 2023-03-22
Supplement: 13098_2023_1028_MOESM2_ESM.pdf [file 13098_2023_1028_MOESM2_ESM.pdf]

|                                                                                                                                                                                                                                                                                                         | PHQ-9*<br>P | CES-D#<br>C | SHI data\$<br>S |
|---------------------------------------------------------------------------------------------------------------------------------------------------------------------------------------------------------------------------------------------------------------------------------------------------------|-------------|-------------|-----------------|
| Group 1                                                                                                                                                                                                                                                                                                 | +           | +           | +               |
| Group 2                                                                                                                                                                                                                                                                                                 | +           | +           | -               |
| Group 3                                                                                                                                                                                                                                                                                                 | +           | -           | +               |
| Group 4                                                                                                                                                                                                                                                                                                 | -           | +           | +               |
| Group 5                                                                                                                                                                                                                                                                                                 | -           | +           | -               |
| Group 6                                                                                                                                                                                                                                                                                                 | +           | -           | -               |
| Group 7                                                                                                                                                                                                                                                                                                 | -           | -           | +               |
| Group 8                                                                                                                                                                                                                                                                                                 | -           | -           | -               |
| * PHQ-9, Patient Health Questionnaire-9<br># CES-D, Center for Epidemiological Studies Depression Scale<br>\$ SHI data, statutory health insurance data<br>+ identified as having depressive disorder through this instrument<br>- not identified as having depressive disorder through this instrument |             |             |                 |

Appendix table 1: Group composition based on depression measurement
