# Supplementary material for: PHQ-9, CES-D, health insurance data—who is identified with depression? A Population-based study in persons with diabetes
Source: Springer Nature journal article supplement (doi:10.1186/s13098-023-01028-7), 2023-03-22
Supplement: 13098_2023_1028_MOESM3_ESM.pdf [file 13098_2023_1028_MOESM3_ESM.pdf]

|                                              | PHQ-9 <sup>a</sup>     |                     |          | CES-D <sup>b</sup>     |                     |          | SHI data <sup>c</sup>  |                      |          |
|----------------------------------------------|------------------------|---------------------|----------|------------------------|---------------------|----------|------------------------|----------------------|----------|
|                                              | No depression symptoms | depression symptoms | p-value  | No depression symptoms | depression symptoms | p-value  | No depression symptoms | depression diagnosis | p-value  |
| Sample size, n                               | 1396                   | 183                 |          | 1321                   | 258                 |          | 1225                   | 354                  |          |
| Age (mean ± SD), years                       | 67.4 ± 9.7             | 64.0 ± 11.0         | 0.001**  | 67.6 ± 9.7             | 64.1 ± 10.4         | 0.001**  | 67.5 ± 9.7             | 65.1 ± 10.5          | 0.001**  |
| Median                                       | 70.0                   | 64.0                |          | 70.0                   | 64.0                |          | 70.0                   | 66.0                 |          |
| Sex, female n (%)                            | 519 (37.2 %)           | 78 (42.6 %)         | 0.18     | 482 (36.5 %)           | 115 (44.6 %)        | 0.005**  | 421 (34.4 %)           | 176 (49.7 %)         | 0.001**  |
| Origin, Germany n (%)                        | 1252 (89.8 %)          | 145 (79.2 %)        | 0.001**  | 1189 (90.1 %)          | 208 (80.6 %)        | 0.001**  | 1088 (89.0 %)          | 309 (87.3 %)         | 0.44     |
| Family status, in a relationship, n (%)      | 1171 (85.0 %)          | 135 (75.8 %)        | 0.001**  | 1117 (85.7 %)          | 189 (74.7 %)        | 0.001**  | 1042 (86.3 %)          | 264 (75.9 %)         | 0.001**  |
| Marital status, n (%)                        |                        |                     |          |                        |                     |          |                        |                      |          |
| Married                                      | 1069 (76.9 %)          | 119 (65.0 %)        | 0.001**  | 1023 (77.7 %)          | 165 (64.2 %)        | 0.001**  | 946 (77.5 %)           | 242 (68.6 %)         | 0.001**  |
| Divorce/separated                            | 85 (6.1 %)             | 27 (14.8 %)         |          | 78 (5.9 %)             | 34 (13.2 %)         |          | 74 (6.1 %)             | 38 (10.8 %)          |          |
| Widowed                                      | 168 (12.1 %)           | 27 (14.8 %)         |          | 151 (11.5 %)           | 44 (17.1 %)         |          | 160 (11.9 %)           | 35 (15.2 %)          |          |
| Employment status, employed n (%)            | 353 (25.8 %)           | 49 (27.4 %)         | 0.72     | 325 (25.1 %)           | 77 (30.7 %)         | 0.08     | 142 (11.6 %)           | 53 (15.0 %)          | 0.54     |
| Retirement status, retired n (%)             | 979 (70.9 %)           | 110 (60.1 %)        | 0.001**  | 940 (71.9 %)           | 149 (58.2 %)        | 0.001**  | 869 (71.8 %)           | 220 (62.3 %)         | 0.001**  |
| Level of education, ISCED ≥14 years, n (%)   | 303 (21.9 %)           | 34 (18.6 %)         | 0.005**  | 289 (22.0 %)           | 48 (18.7 %)         | 0.001**  | 271 (22.3 %)           | 66 (18.7%)           | 0.001**  |
| Diabetes duration (mean ± SD), years         | 10.9 (8.3)             | 11.8 (8.5)          | 0.64     | 10.9 (8.3)             | 11.7 (8.4)          | 0.5      | 11.0 ± 8.3             | 11.0 (8.1)           | 0.36     |
| median                                       | 9.0                    | 10.0                |          | 9.0                    | 10.0                |          | 9.0                    | 9.0                  |          |
| Type of Diabetes, n (%)                      |                        |                     |          |                        |                     |          |                        |                      |          |
| Type 1 Diabetes                              | 110 (7.9 %)            | 18 (10.0 %)         | 0.65     | 101 (7.7 %)            | 27 (10.6 %)         | 0.36     | 99 (8.3 %)             | 29 (8.3 %)           | 0.10     |
| Type 2 Diabetes                              | 1192 (86.0 %)          | 153 (85.0 %)        |          | 1132 (86.3 %)          | 213 (83.9 %)        |          | 1053 (86.7 %)          | 292 (83.2 %)         |          |
| Type unknown/other                           | 84 (6.1 %)             | 9 (5.0 %)           |          | 79(6.0 %)              | 14 (5.5 %)          |          | 63 (5.2 %)             | 30 (8.5 %)           |          |
| Diabetes severity aDCSI (mean ± SD)          | 3.0 (2.2)              | 3.3 (2.3)           | 0.39     | 3.0 (2.2)              | 3.1 (2.2)           | 0.005**  | 2.9 (2.3)              | 3.4 (2.3)            | 0.05     |
| median                                       | 3.0                    | 3.0                 |          | 3.0                    | 3.0                 |          | 3.0                    | 3.0                  |          |
| Number of comorbidities (mean ± SD)          | 3.6 (2.1)              | 4.2 (2.1)           | 0.001**  | 3.6 (2.1)              | 4.1 (2.2)           | 0.001**  | 3.4 (1.9)1384          | 4.7 (2.5)            | <0.001** |
| median                                       | 3.0                    | 4.0                 |          | 3.0                    | 4.0                 |          | 3.0                    | 4.0                  |          |
| Treatment, n (%)                             |                        |                     |          |                        |                     |          |                        |                      |          |
| Taking insulin                               | 416 (29.8 %)           | 70 (38.3 %)         | 0.001**  | 393 (29.8 %)           | 93 (36.1 %)         | 0.05     | 374 (30.5 %)           | 112 (31.6 %)         | 0.74     |
| Taking oral antihyperglycemic drugs          | 950 (68.1 %)           | 121 (66.1 %)        | 0.66     | 908 (68.7 %)           | 163 (63.2 %)        | 0.09     | 838 (68.4 %)           | 233 (65.8 %)         | 0.39     |
| Taking antidepressants                       | 184 (13.2 %)           | 92 (50.3 %)         | <0.001** | 165 (12.5 %)           | 111 (43.0 %)        | <0.001** | 86 (7.0 %)             | 190 (53.7 %)         | <0.001** |
| Health care costs for 2 years (mean ± SD), € | 9619.5                 | 13963.6             | 0.49     | 9712.1                 | 12226.51            | 0.49     | 8988.3 (12199.6)       | 14049.5              | 0.49     |
| median                                       | (12648.0)              | (16281.2)           |          | (12974.2)              | (14073.2)           |          | 5495.7                 | (15540.8)            |          |
|                                              | 5828.1                 | 8627.5              |          | 5794.8                 | 7773.7              |          |                        | 8187.7               |          |
| Health related Quality of Life (mean ± SD)   |                        |                     |          |                        |                     |          |                        |                      |          |
| median                                       |                        |                     |          |                        |                     |          |                        |                      |          |
| PCS12                                        | 43.0 (10.4)            | 31.1 (8.8)          | <0.001** | 43.4 (10.3)            | 32.8 (9.3)          | 0.005**  | 43.0 (10.6)            | 37.3 (10.8)          | <0.001** |
|                                              | 44.7                   | 29.0                |          | 45.7                   | 31.8                |          | 44.8                   | 36.4                 |          |
| MCS12                                        | 52.1 (8.9)             | 34.2 (8.7)          | <0.001** | 52.9 (8.4)             | 35.8 (8.6)          | 0.001**  | 52.0 (9.0)             | 43.4 (12.3)          | <0.001** |
|                                              | 55.1                   | 32.7                |          | 55.6                   | 34.9                |          | 55.2                   | 42.3                 |          |
| PAID                                         | 16.8 (15.0)            | 40.6 (22.5)         | 0.001**  | 15.2 (13.4)            | 41.5 (20.1)         | <0.001** | 17.4 (16.0)            | 26.3 (21.0)          | 0.001**  |
|                                              | 13.0                   | 41.0                |          | 11.0                   | 43.0                |          | 13                     | 23                   |          |
| Previous depression, n (%)                   |                        |                     |          |                        |                     |          |                        |                      |          |
| Yes                                          | 144 (10.3 %)           | 81 (44.3 %)         | <0.001** | 125 (9.5 %)            | 100 (38.7 %)        | 0.001**  | 73 (6.0 %)             | 152 (43.1 %)         | <0.001** |
| No                                           | 993 (71.3 %)           | 48 (26.2 %)         |          | 969 (73.6 %)           | 72 (27.9 %)         |          | 921 (75.4 %)           | 120 (34.0 %)         |          |
| unknown                                      | 255 (18.3 %)           | 54 (29.5 %)         |          | 223 (16.9 %)           | 86 (33.3 %)         |          | 228 (18.7 %)           | 81 (23.0 %)          |          |

+ PHQ-9, Patient Health Questionnaire-9  
# CES-D, Center for Epidemiological Studies Depression Scale  
\$ SHI data, statutory health insurance data  
\*\* - the difference between groups were statistically significant.

Appendix table 2: Description of persons identified by the different methods.
